# Supplementary material for: Celiac Disease Histopathology Recapitulates Hedgehog Downregulation, Consistent with Wound Healing Processes Activation
Source: PubMed Central journal article supplement (PMC4674131; doi:10.1371/journal.pone.0144634), 2015-12-09
Supplement: pone.0144634.s001.pdf [file pone.0144634.s001.pdf]

S1 Fig.

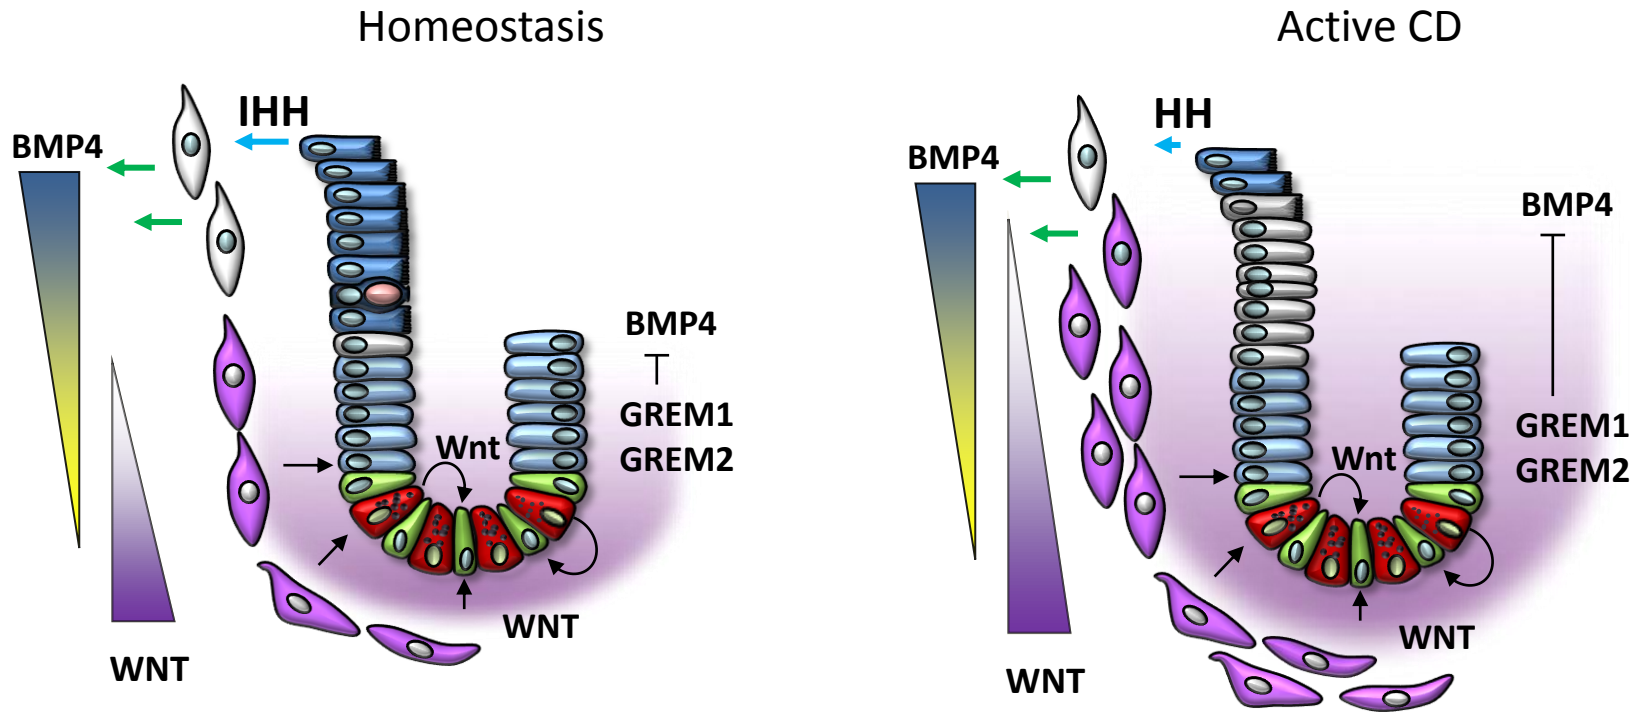

● Mature epithelial cells ● Intestinal stem cells ● Paneth's cells ● ISEMF
