# Supplementary material for: Celiac Disease Histopathology Recapitulates Hedgehog Downregulation, Consistent with Wound Healing Processes Activation
Source: PubMed Central journal article supplement (PMC4674131; doi:10.1371/journal.pone.0144634), 2015-12-09

S3 Fig.

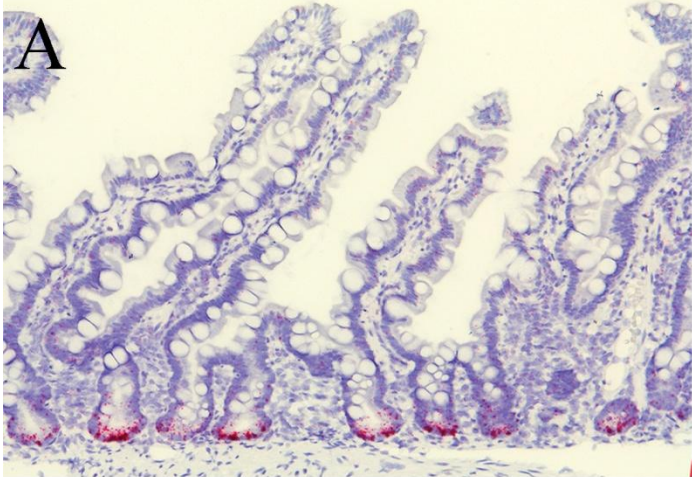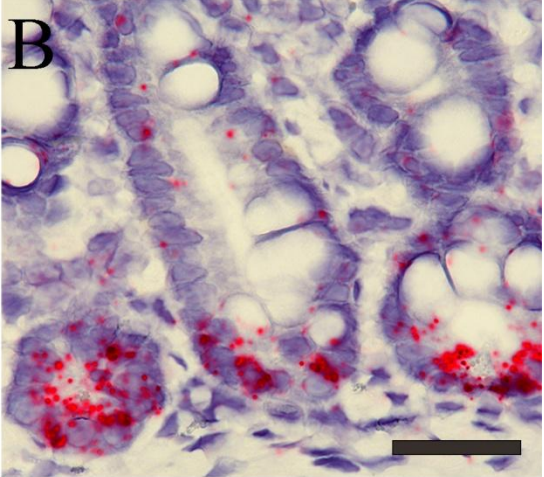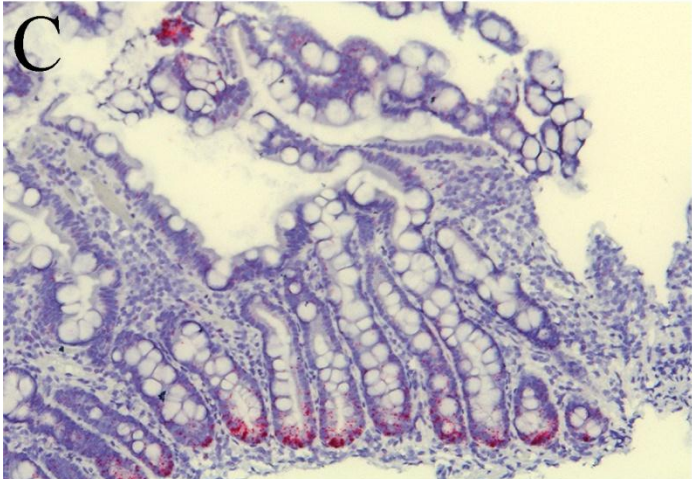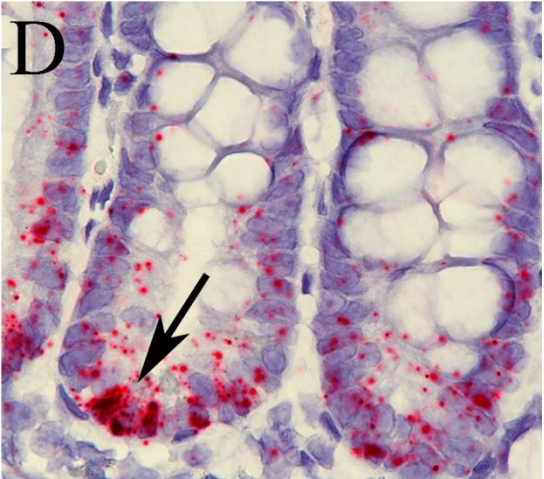

Supplement: pone.0144634.s003.pdf [file pone.0144634.s003.pdf]
